# Supplementary material
Source: PubMed Central journal article supplement (PMC10507595)
Supplement: jamainternmed-e234764-s003.pdf [file jamainternmed-e234764-s003.pdf]

## Data Sharing Statement

Guterman. Care Ecosystem Collaborative Model and Health Care Costs in Medicare Beneficiaries With Dementia. *JAMA Intern Med.* Published September 18, 2023.  
doi:10.1001/jamainternmed.2023.4764

### Data

**Data available:** Yes

**Data types:** Deidentified participant data

**How to access data:** Deidentified participant data, including demographics, aggregated utilization, and caregiver outcomes, will be available via MedRIC. For information about the partnership between Care Ecosystem and MedRIC, visit <https://www.medic.info/partners-pages/ce>. For information on how to request Care Ecosystem data via MedRIC, visit <https://www.medic.info/request/data-request-new>. For Step 3 of the MedRIC partner data request process, contact [Katherine.Possin@ucsf.edu](mailto:Katherine.Possin@ucsf.edu)

**When available:** With publication

### Supporting Documents

**Document types:** None

### Additional Information

**Who can access the data:** researchers whose proposed use of the data has been approved

**Types of analyses:** for any purpose

**Mechanisms of data availability:** with investigator support, after approval of a proposal, with a signed data access agreement
